# Supplementary material
Source: PubMed Central journal article supplement (PMC3098751)
Supplement: NIHMS287265-supplement-supplementary.pdf [file NIHMS287265-supplement-supplementary.pdf]

# Thank You

This PowerPoint document contains the images that you requested.

**Copyright Notice**

All Online Service materials, including, without limitation, text, pictures, graphics and other files and the selection and arrangement thereof are copyrighted materials of Ovid or its licensors, all rights reserved. Except for the Authorized Use specified above, you may not copy, modify or distribute any of the Online Service materials. You may not "mirror" any material contained on this Online Service on any other server. Any unauthorized use of any material contained on this Online Service may violate copyright laws, trademark laws, the laws of privacy and publicity and communications regulations and statutes.

# Table 1

|                                                           |                    |
|-----------------------------------------------------------|--------------------|
| Warfarin dose                                             |                    |
| Median                                                    | 32.5 mg/week       |
| Interquartile range                                       | 24.0–42.5 mg/week  |
| VKORC1 genotype                                           |                    |
| G/G                                                       | 38 (37)            |
| A/G                                                       | 46 (44)            |
| A/A                                                       | 16 (15)            |
| NA                                                        | 4 (4)              |
| CYP2C9 genotype                                           |                    |
| *1/*1                                                     | 61 (59)            |
| *1/*2                                                     | 17 (16)            |
| *3/*18                                                    | 10 (10)            |
| *2/*2                                                     | 4 (4)              |
| *1/*6                                                     | 2 (2)              |
| *1/*11                                                    | 2 (2)              |
| *1/*12                                                    | 2 (2)              |
| *6/*7                                                     | 1 (1)              |
| *1/*9                                                     | 1 (1)              |
| *2/*12                                                    | 1 (1)              |
| *3/*12/*18                                                | 1 (1)              |
| NA                                                        | 2 (2)              |
| CYP4F2 genotype                                           |                    |
| C/C                                                       | 55 (53)            |
| T/C                                                       | 40 (38)            |
| T/T                                                       | 6 (6)              |
| NA                                                        | 3 (3)              |
| Age                                                       |                    |
| Mean, median                                              | 64 years, 67 years |
| Interquartile range                                       | 53–75.3 years      |
| Height                                                    |                    |
| Mean, median                                              | 172 cm, 173 cm     |
| Interquartile range                                       | 163–180 cm         |
| Weight                                                    |                    |
| Mean, median                                              | 81 kg, 78.8 kg     |
| Interquartile range                                       | 64.9–90.7 kg       |
| Race                                                      |                    |
| White                                                     | 78 (75)            |
| Asian                                                     | 18 (17)            |
| Black                                                     | 8 (8)              |
| Sex                                                       |                    |
| Male                                                      | 60 (58)            |
| Female                                                    | 44 (42)            |
| Inducers use                                              |                    |
| Number (percent)                                          | 1 (1)              |
| Amiodarone use                                            |                    |
| Number (percent)                                          | 5 (5)              |
| Inducers included carbamazepine, rifampin, and phenytoin. |                    |

**Extending and evaluating a warfarin dosing algorithm that includes CYP4F2 and pooled rare variants of CYP2C9.**

Sagrieya, Hersh; Berube, Caroline; Wen, Alice; Ramakrishnan, Ramesh; Mir, Alain; Hamilton, Amy; Altman, Russ

Pharmacogenetics and Genomics. 20(7):407-413, July 2010.

DOI: 10.1097/FPC.0b013e328338bac2

Table 1 Characteristics of the patient population (N=104)  
Inducers included carbamazepine, rifampin, and phenytoin.

# Fig. 1

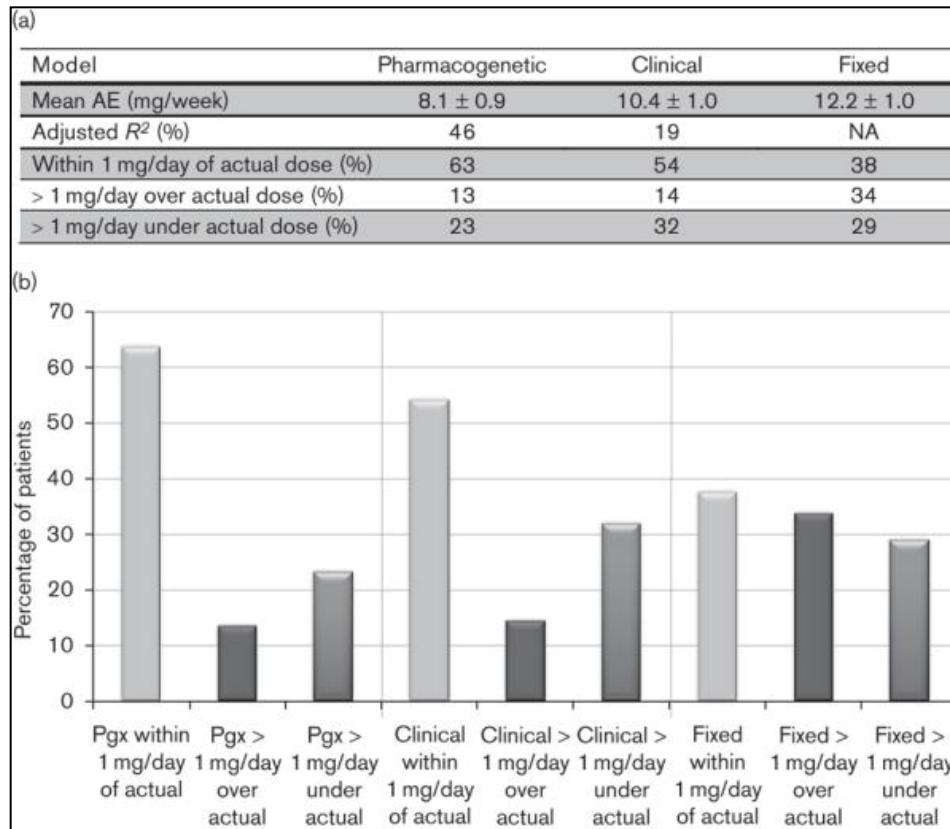

**Extending and evaluating a warfarin dosing algorithm that includes CYP4F2 and pooled rare variants of CYP2C9.**

Sagrieya, Hersh; Berube, Caroline; Wen, Alice; Ramakrishnan, Ramesh; Mir, Alain; Hamilton, Amy; Altman, Russ

Pharmacogenetics and Genomics. 20(7):407-413, July 2010.

DOI: 10.1097/FPC.0b013e328338bac2

Fig. 1 (a) Performance of the three different dosing models: pharmacogenetic, clinical, and fixed. Includes all patients who reached stable dose (N=104). (b) Percentage of patients who were either within 1 mg/day of the actual dose, more than 1 mg/day over the actual dose, or more than 1 mg/day under the actual dose for the three different dosing models: pharmacogenetic, clinical, and fixed.

## Table 2

| <i>CYP2C9</i> SNP        | Number         | Average dose $\pm$ SE |
|--------------------------|----------------|-----------------------|
| *12 C/C                  | 87             | 36.3 $\pm$ 1.7        |
| *12 T/C                  | 4              | 19.6 $\pm$ 2.6        |
| *12 NA                   | 13             | 34.1 $\pm$ 5.1        |
| *18 A/A                  | 87             | 36.5 $\pm$ 1.7        |
| *18 T/A                  | 11             | 27.2 $\pm$ 3.3        |
| *18 NA                   | 6              | 35.3 $\pm$ 8.1        |
| <i>CYP2C9</i> regression | Adjusted $R^2$ | $P$ value             |
| *12                      | 3.9%           | 0.034                 |
| *18                      | 2.5%           | 0.064                 |

**Extending and evaluating a warfarin dosing algorithm that includes *CYP4F2* and pooled rare variants of *CYP2C9*.**

Sagrieya, Hersh; Berube, Caroline; Wen, Alice; Ramakrishnan, Ramesh; Mir, Alain; Hamilton, Amy; Altman, Russ

Pharmacogenetics and Genomics. 20(7):407-413, July 2010.

DOI: 10.1097/FPC.0b013e328338bac2

Table 2 Analysis of rare *CYP2C9* variants. Analysis of the \*12 and \*18 alleles alone SNP, single nucleotide polymorphism.

## Table 3

| <i>CYP2C9</i> (*6–*18)    | Number | Average dose ± SE | Comparison                     | Value  |
|---------------------------|--------|-------------------|--------------------------------|--------|
| Homozygous WT at all SNPs | 82     | 37.6 ± 1.8        | <i>P</i> value                 | 0.0065 |
| Heterozygous at any       | 20     | 27.0 ± 2.1        | Adjusted <i>R</i> <sup>2</sup> | 6%     |

SNP, single nucleotide polymorphism; WT, wild-type.

**Extending and evaluating a warfarin dosing algorithm that includes *CYP4F2* and pooled rare variants of *CYP2C9*.**

Sagrieya, Hersh; Berube, Caroline; Wen, Alice; Ramakrishnan, Ramesh; Mir, Alain; Hamilton, Amy; Altman, Russ

Pharmacogenetics and Genomics. 20(7):407-413, July 2010.

DOI: 10.1097/FPC.0b013e328338bac2

Table 3 Comparison of individuals who were either wild-type for \*6, \*7, \*9, \*11, \*12, and \*18, or had a variant genotype at any of these alleles SNP, single nucleotide polymorphism; WT, wild-type.

## Table 4

| <i>CYP2C9</i> (*2-3)      | Number | Average dose $\pm$ SE | Comparison                     | Value  |
|---------------------------|--------|-----------------------|--------------------------------|--------|
| Homozygous WT at all SNPs | 69     | 38.6 $\pm$ 2.1        | <i>P</i> value                 | 0.0034 |
| Heterozygous at any       | 33     | 28.9 $\pm$ 1.7        | Adjusted <i>R</i> <sup>2</sup> | 7%     |

SNP, single nucleotide polymorphism; WT, wild-type.

**Extending and evaluating a warfarin dosing algorithm that includes *CYP4F2* and pooled rare variants of *CYP2C9*.**

Sagrieya, Hersh; Berube, Caroline; Wen, Alice; Ramakrishnan, Ramesh; Mir, Alain; Hamilton, Amy; Altman, Russ

Pharmacogenetics and Genomics. 20(7):407-413, July 2010.

DOI: 10.1097/FPC.0b013e328338bac2

Table 4 Comparison of individuals who were either wild-type for \*2 and \*3, or had a variant genotype at either \*2 or \*3 SNP, single nucleotide polymorphism; WT, wild-type.

## Table 5

| <i>CYP2C9</i> (*2–*18)    | Number | Average dose $\pm$ SE | Comparison                     | Value   |
|---------------------------|--------|-----------------------|--------------------------------|---------|
| Homozygous WT at all SNPs | 61     | 40.2 $\pm$ 2.2        | <i>P</i> value                 | 0.00018 |
| Heterozygous at any       | 41     | 28.5 $\pm$ 1.5        | Adjusted <i>R</i> <sup>2</sup> | 12%     |

SNP, single nucleotide polymorphism; WT, wild-type.

**Extending and evaluating a warfarin dosing algorithm that includes *CYP4F2* and pooled rare variants of *CYP2C9*.**

Sagrieya, Hersh; Berube, Caroline; Wen, Alice; Ramakrishnan, Ramesh; Mir, Alain; Hamilton, Amy; Altman, Russ

Pharmacogenetics and Genomics. 20(7):407-413, July 2010.

DOI: 10.1097/FPC.0b013e328338bac2

Table 5 Comparison of individuals who were either wild-type for \*2, \*3, \*6, \*7, \*9, \*11, \*12, and \*18, or had a variant genotype at any of these alleles SNP, single nucleotide polymorphism; WT, wild-type.

## Table 6

| Model                     | MAE ± SE (mg/week) | Adjusted R <sup>2</sup> (%) |
|---------------------------|--------------------|-----------------------------|
| IWPC Pgx. (2009) [29]     | 7.80 ± 0.84        | 50                          |
| IWPC clinical (2009) [29] | 10.14 ± 1.04       | 22                          |
| Gage <i>et al.</i> [23]   | 7.79 ± 0.83        | 49                          |
| Sconce <i>et al.</i> [25] | 8.98 ± 0.94        | 47                          |
| Zhu <i>et al.</i> [28]    | 8.98 ± 0.95        | 39                          |
| Tham <i>et al.</i> [26]   | 9.72 ± 0.95        | 33                          |
| Herman <i>et al.</i> [24] | 9.73 ± 0.89        | 47                          |
| Wu <i>et al.</i> [27]     | 9.98 ± 0.95        | 35                          |

**Extending and evaluating a warfarin dosing algorithm that includes CYP4F2 and pooled rare variants of CYP2C9.**

Sagrieya, Hersh; Berube, Caroline; Wen, Alice; Ramakrishnan, Ramesh; Mir, Alain; Hamilton, Amy; Altman, Russ

Pharmacogenetics and Genomics. 20(7):407-413, July 2010.

DOI: 10.1097/FPC.0b013e328338bac2

Table 6 Comparison of model performance This analysis was restricted to the 95 patients who had all the variables necessary for the eight different dosing equations. IWPC, International Warfarin Pharmacogenetics Consortium; MAE, mean absolute error.
